# Supplementary material for: Precise engineering and visualization of signs and magnitudes of DNA writhe on the basis of PNA invasion
Source: Royal Society of Chemistry journal article supplement (doi:10.1039/c1cc13158c), 2011-01-01
Supplement: c1cc13158c.pdf [file c1cc13158c.pdf]

## **Supplementary Information**

### **Precise engineering and visualization of signs and magnitudes of DNA writhe on basis of PNA invasion**

Dawei Li, Zhaoqi Yang, Yi Long, Guanxia Zhao, Bei Lv, Shuhui Hiew, Magdeline Tao Tao Ng,  
Juanjuan Guo, HongKee Tan, Hao Zhang, Weixing Yuan, Haibin Su and Tianhu Li\*

## EXTENDED EXPERIMENTAL PROCEDURES

**Reagents:** Taq DNA Polymerase, T4 DNA ligase, Nuclease BAL-31 and SacI were purchased from New England Biolabs (Ipswich, MA). All Plasmid DNA were provided by Generay Biotech (Shanghai, China).

**Polymerase chain reaction:** Polymerase chain reaction was carried out following standard procedures with Taq DNA Polymerase. Primers for linear DNA 1: ssODN-1 (5'-3': CCGAGCTCCCGTAATACGACTCACTTA) and ssODN-2 (5'-3': TCGTTTGGTATGGCTTCATT). Primers for linear DNA 2: ssODN-3 (5'-3': GTGGATCCTCGTCGCAAAC) and ssODN-4 (5'-3': CCGAGCTCAGCGCGCAATTAACCCTCAC).

**Reactions of SacI with Linear DNA :** A solution containing 10 mM Bis-Tris-Propane-HCl, 10 mM MgCl<sub>2</sub>, 1 mM Dithiothreitol, linear DNA (500 ng) and 10 U SacI was incubated at 37 °C for 1 hr. The reaction products were further analyzed using agarose electrophoresis (2%).

**Preparations of circular DNA:** A 50 µl solution containing 50 mM Tris-HCl, 10 mM MgCl<sub>2</sub>, 1 mM ATP, 10 mM dithiothreitol, 500 ng linear DNA with cohesive ends and 20 U T4 DNA ligase was incubated at 16 °C for 8 hrs. The obtained circular DNA products were further analyzed using agarose electrophoresis (2%).

**PNA invasion:** In the binding reactions of PNA 1 to target sites, the PNA concentration was kept at a large excess over the DNA concentration, and the binding was performed at 37 °C for 6 hr in 10mM Sodium-Phosphate Buffer (PH = 6.9).

**AFM studies:** Immobilization of DNA samples on micas were carried out following the previously reported procedures.<sup>S1,S2</sup> AFM images were obtained in Tapping Mode<sup>TM</sup> on a

Multimode<sup>TM</sup> AFM (Veeco, Santa Barbara, CA) in connection with a Nanoscope V<sup>TM</sup> controller. Antimony (n) doped Si cantilevers with nominal spring constants between 20 and 80 N/m were selected. Scan frequency was 1.9 Hz per line and the modulation amplitude was in a nanometer range. All DNA sample determinations were carried out in air at room temperature.

### **DETAILED LEGEND OF FIGURE 2:**

(C) Illustration of molecular structure of PNA 1. PNAs are written from the N terminus to the C terminus using normal peptide conventions: H is a free amino group; NH<sub>2</sub> is a terminal carboxamide; Lys is the lysine residue; J denotes pseudoisocytosine and eg1 denotes the linker unit, 8-amino-3,6-dioxaoctanoic acid.

### **DETAILED LEGEND OF FIGURE 3:**

(B) AFM image of negatively supercoiled structure with writhe number of -2 (scale bar 100 nm): I) height image; II) amplitude and III) 3D image showing the ring crossing path more clearly; IV) section image analysis of the self-crossing.

### **DETAILED LEGEND OF FIGURE 4:**

(B) AFM image of positively supercoiled structure with writhe number of +1 (scale bar 100 nm): I) height image; II) amplitude and III) 3D image showing the ring crossing path more clearly; IV) section image analysis of the self-crossing.

A

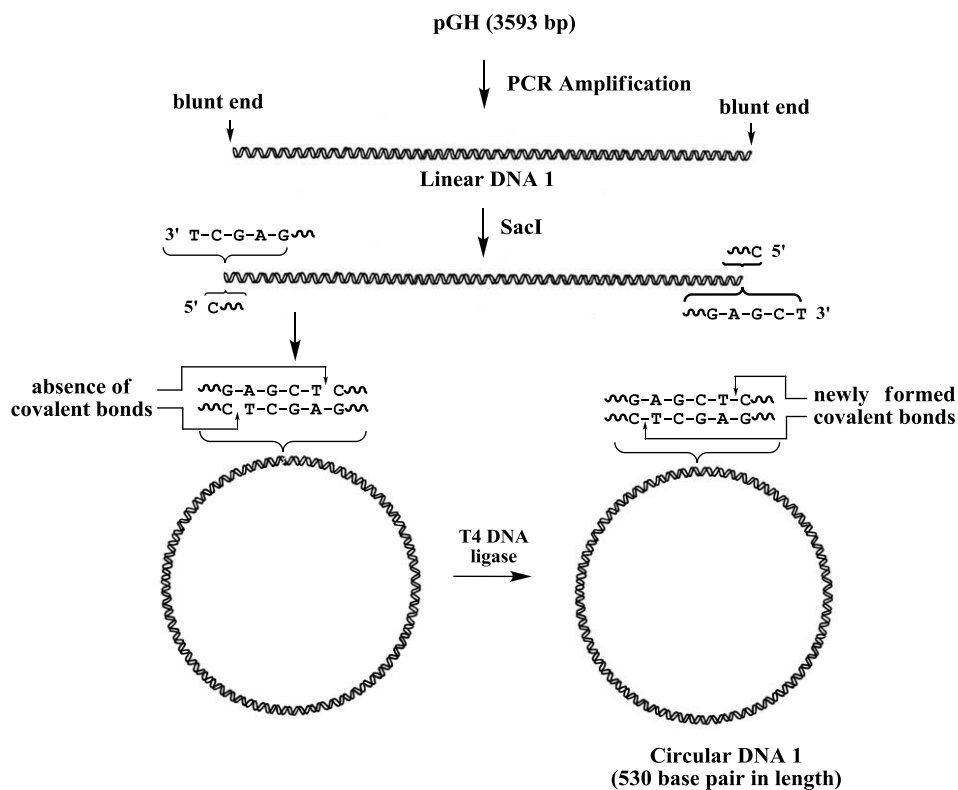

B

```

5' CCGAGCTCCCGTAATACGACTCACTTAAGGCCTTGACTAGAGGGTACCAACCTAGGTATCTAGAACCGTCTCGAGCCATAACTTCGTATAG
3' GGCTCGAGGGCATTATGCTGAGTGAATCCGGAAGTATCTCCCATGGTGGATCCATAGATCTTGGCCAGAGCTCGGTATTGAAGCATATC
CATACTTATACGAAGTTATATAAGCTGTCAAACATGAGAATCTTGTATAGGTTAATGTCATGATAAATAATGGTTTCTTAGACGTCAGGT
GTATGTAATATGCTTCAATATATTCGACAGTTTGTACTCTTAAGAACAATATCCAATTACAGTACTATATTACCAAAAGAAATCTGCAGTCCA
GGCACTTTTCGGGGAAATGTGCGCGGAACCCCTATTTGTTTATTTTTCTAAATACATTCAAATATGTATCCGCTCATGACAAATAACCCGTG
CCGTGAAAAGCCCTTTACACGCGCCTTGGGGATAAAACAATAAAAAGATTTTATGTAAGTTTATACATAGGCGAGTACTCTGTTATTGGGAC
ATAAATGCTTCAATAATATTGAAAAAGGAAGATGAGTATTCACATTTCCGTGTCGCCCTTATTCCTTTTTTTCGGCATTTCCTTC
TATTTACGAAGTATTATAACTTTTTCCTTCTCATACTCATAAGTTGTAAAGGCACAGCGGGAATAAGGGAAAAACCGCGTAAAACGGGAAG
CTGTTTTTGCTCACCCAGAAACGCTGGTGAAGTAAAAGATGCTGAAGATCAGTTGGGTGCACGAGTGGGTTACATCGAACTGGATCTCAAC
GACAAAACGAGTGGGTCTTTGCGACCCTTTCATTTTCTACGACTTCTAGTCAACCCACGTGCTCACCAATGTAGCTTGACCTAGAGTTG
AGCGGTAAGTTAAGCTTTTTCACAACATGCGGGATCATGTAACCTCGCCTTGATCGAAGGAGAGAAAGAGCTGGAGCTCAATGAAGCCATACC
TCGCCATTCAAATCGAAAACGTGTTGTACCCCTAGTACATTGAGCGGAAC TAGCTTTCCTCTCTTCTCGACCTCGAGTACTTCGGTATGG
AAACGA 3'
TTTGCT 5'

```

Linear DNA 1\*

\* This linear DNA 1 was obtained by PCR amplification from vector pGH (3593 bp).  
The duplex segment highlighted in red is designed PNA binding site.

C

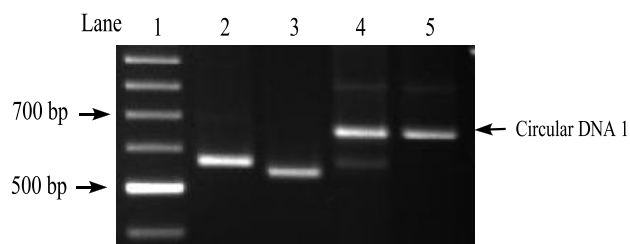

**Fig. S1** Synthesis and confirmation of Circular DNA 1 (530 bp in length) from Linear DNA 1 (558 bp in length).

(A) Diagrammatic illustration of synthesis of Circular DNA 1 from Plasmid DNA (pGH (3593 bp)); (B) Nucleotide sequences of Linear DNA 1 (PCR product); (C) Agarose gel electrophoretic analysis of DNA products; Lane 1: Molecular weight markers; Lane 2: Linear DNA 1 obtained by PCR amplification; Lane 3: Digested product of Linear DNA 1 by SacI; Lane 4: Circular DNA (Circular DNA 1) promoted by T4 DNA Ligase; Lane 5: reaction mixture of ligase reaction followed by Nuclease BAL-31 hydrolysis

A

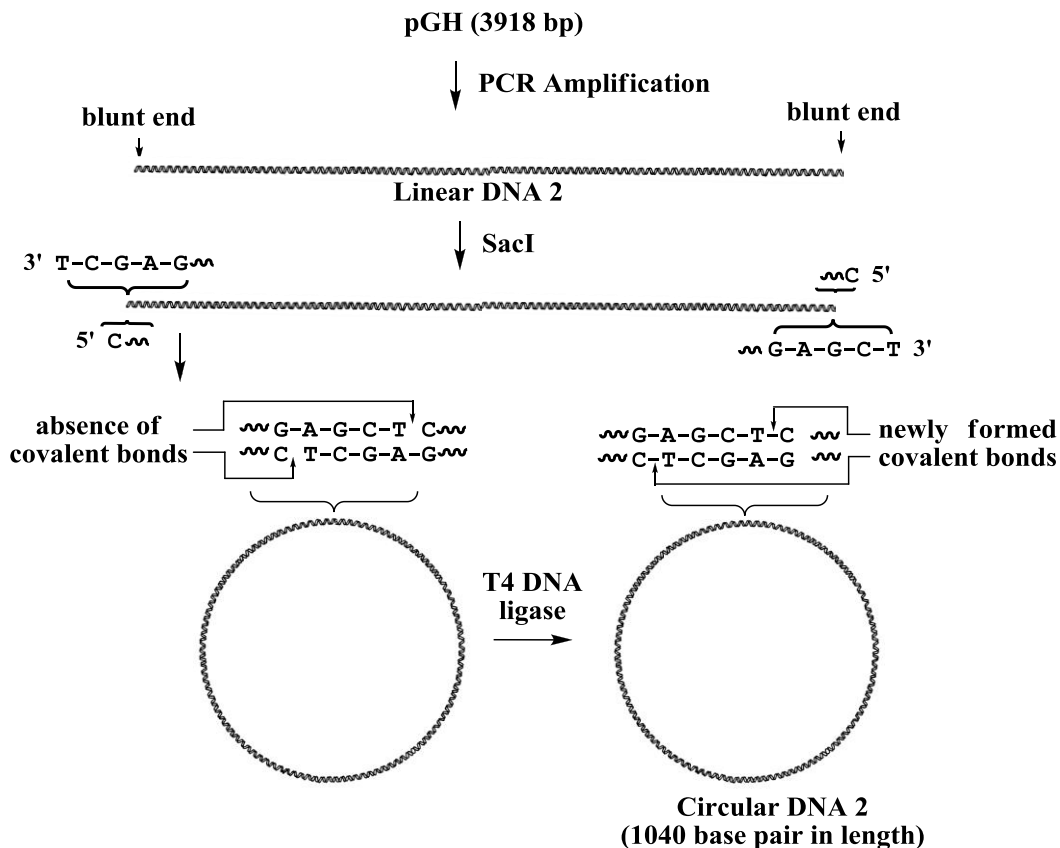

B

```

5' GTGGATCCTCGTCGCAAAACGAGCTCCGATTAAGTTGGGTAACGCCAGGGTTTTCCAGTCACGACGTTGTA AAAACGACGGCCAGTCCGTAATA
3' CACCTAGGAGCAGCGTTTTGCTCGAGGCTAATTC AACCCATTGCGGTCCCAAAAGGGTCAGTGC TGCAACATTTGCTGCCGGTCAGGCATTAT
CGGCTCACTTAAGGCCTTGACTAGAGGGTACCAACCTAGGTATCTAGAACCGGTCTCGAGCCATAACTTCGTATAGCATA CATTATACGAAGTT
GCGGAGTGAAATCCGGAAC T GATCTCCCATGGTTGGATCCATAGATCTTGGCCAGAGCTCGGTATTGAAGCATA TCGTATGTAATATGCTTCAA
ATATAAGCTGTCAAACATGAAACCTCTTGTATAGGTTAATGTCATGATAATAATGGTTTCTTAGACGTCAGGTGGCACTTTTCGGGGAAATGT
TATATTCGACAGTTTGTACTTTGGAGAACAATATCCAATTACAGTACTATTATTACCAAGAACTGTCAGTCCACCGTGAAAAGCCCCTTTACA
GCGCGGAACCCCTATTTGTTTTATTTCTAAATACATTCAAATATGTATCCGCTCATAATAACCTGTATAAATGCCTTCAATAATTGAAAAG
CGCGCCTTGGGGATAAACAATAAAAAGATTTATGTAAGTTTATACATAGGCGAGTATTATTGGGACTATTTACGAAGTTATTTAACTTTTTTC
GAGAAGATTGACATCACATAAACTATTCATACAGGATAAATFGGGAGGCTTTATTGAAAGCCCACTCACTGATTAACGGGCCTTCTGTTTTTGC
CTCTTCTAACTGTAGTATTTTGATAAGTATGTCTATTAAACCCTCCGAAATAACTTTCCGGTGAGTGACTAATTGCCCGGAAGGACAAAACG
TCACCCAGAAACGCTGGTGAAGTAAAAGATGCTGAAGATCAGTTGGGTGCACGAGTGGGTTACATCGAACTGGATCTCAACAGCGGTAAGTTA
AGTGGGCTTTTTGCGACCACTTTCATTTCTACGACTTCTAGTCAACCCACGTGCTCACCCAATGTAGCTTGACCTAGAGTTGTCGCCATTCAAT
AGCTTTTTGCACAACATGGGGGATCATGTAACCTCGCTTGATCGAAGGAGAGAATCCAAGAGAGGAA TAGCTCTCTTTTTGAGGTGTGTGCTCAA
TCGAAAACGCTGTTGTACCCCTAGTACATTGAGCGGAAC T AGCTTCTCTCTTAGGTTCTCTCTTATCGAGAGGAAAAC TCCACAACGAGTT
TGAAGCCATACCAACGACGAGCGTGACACCAGATGCCTGCAGTGATTCTCGAGCCATAACTTCGTATAGCATA CATTATACGAAGTTATCC
ACTTCGGTATGGTTGCTGCTCGCACTGTGGTGCTACGGACGTCACTAAGGAGCTCGGTATTGAAGCATA TCGTATGTAATATGCTTCAATAGG
ATGGACTAGTGTATTACGTAGCTTGGCGTAATCATGGTCATAGCTGTTTCCTGTGTGAAAATTGTTATCCGCTCACAATCCACACAACATACGA
TACCTGATCACATAATGCATCGAACCCGATTAGTACCAGTATCGACA AAGGACACACTTTAACAA TAGGGCAGTGTTAAGGTGTGTGTATGCT
GCCGGAAGCATAAAGTGTAAAGCCCTGGGGAAATTCGGGGTTAACCATGGAATCCGGGGATATCACGTGAAGCTTGAAGCTCCAGCTTTTTGTC
CGGCCTTCGTATTTACATTTCCGACCCCTTAAGCCCCAATTGGTACTAGGCCCTTATAGTGCACCTTCGAACGTTCCGAGGTCGAAAACAAG
CCTTTAGTGAGGGTTAATTGCGCGCTGAGCTCGG 3'
GAAATCACTCCAATTAACGCCGACTCGAGCC 5'
    
```

Linear DNA 2\*

\* This linear DNA 2 was obtained by PCR amplification from vector pGH (3918 bp).  
 The duplex segments highlighted in red are designed PNA binding sites.

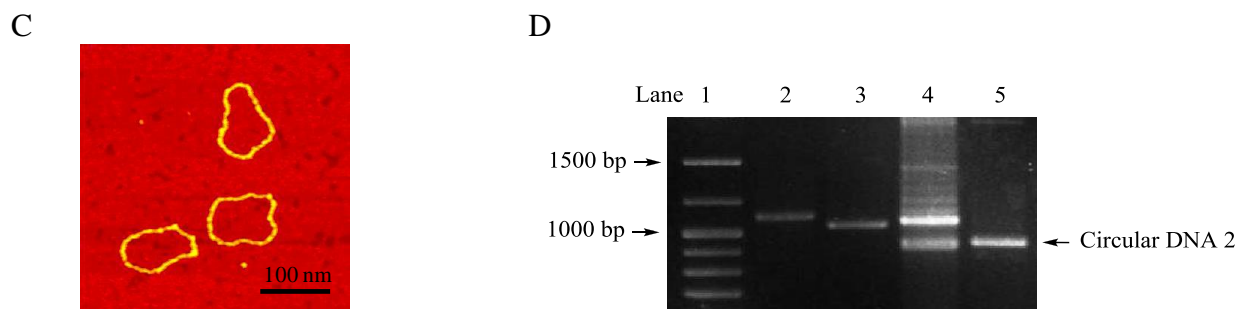

**Fig. S2** Synthesis and confirmation of Circular DNA 2 (1040 bp in length) from Linear DNA 1 (1068 bp in length).

(A) Diagrammatic illustration of synthesis of Circular DNA 2 from Plasmid DNA (pGH (3918 bp)); (B) Nucleotide sequences of Linear DNA 2 (PCR product); (C) AFM images of Circular DNA 2 (scale bar 100 nm). (D) Agarose gel electrophoretic analysis of DNA products. Lane 1: Molecular weight markers; Lane 2: Linear DNA 2 obtained by PCR amplification; Lane 3: Digested product of Linear DNA 2 by SacI; Lane 4: Circular DNA (Circular DNA 2) promoted by T4 DNA Ligase; Lane 5: reaction mixture of ligase reaction followed by Nuclease BAL-31 hydrolysis



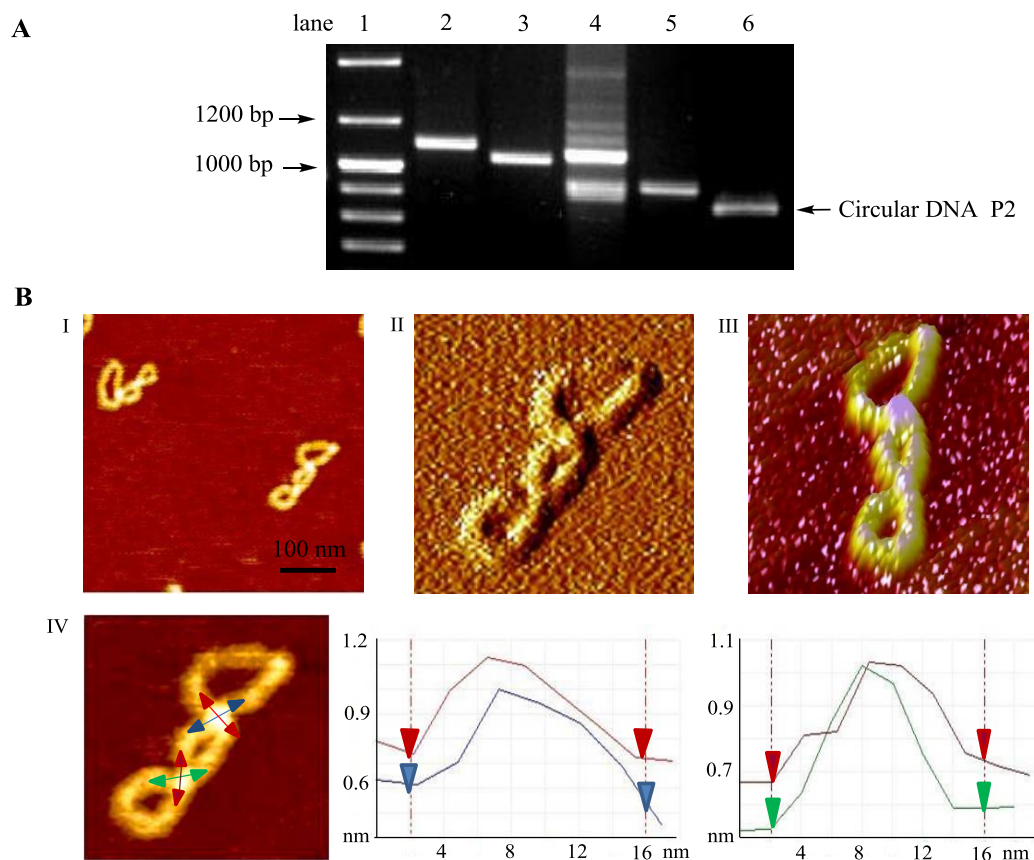

**Fig. S3** Engineering of positive DNA supercoil with writhe number of +2 (Circular DNA P2).

(A) Agarose gel electrophoretic analysis of DNA products. Lane 1: Molecular weight markers; Lane 2: Linear DNA 2 obtained by PCR amplification; Lane 3: Digested product of Linear DNA 2 by *Sac*I; Lane 4: Circular DNA (Circular DNA 2) promoted by T4 DNA Ligase; Lane 5: Reaction mixture of ligase reaction followed by Nuclease BAL-31 hydrolysis; Lane 6: PNA-containing circular DNA P2 produced upon the invasion of PNA 1; (B) AFM image of positively supercoiled structure with writhe number of +2 (scale bar 100 nm): I) height image; II) amplitude and III) 3D image showing the ring crossing path more clearly; IV) section image analysis of the self-crossing.

Table S1. Statistical data of DNA molecules examined using AFM and their measurement errors

|                 | Total number of DNA molecules measured | Height of duplex DNA molecules (nm) | Height of ring crossing (nm) | Number of DNA molecules with no self-crossing | Number of DNA molecules with one self-crossing | Number of DNA molecules with two self-crossings | Number of DNA molecules identified as positive supercoils | Number of DNA molecules identified as negative supercoils | Identifiable rate of self-crossing |
|-----------------|----------------------------------------|-------------------------------------|------------------------------|-----------------------------------------------|------------------------------------------------|-------------------------------------------------|-----------------------------------------------------------|-----------------------------------------------------------|------------------------------------|
| Circular DNA 1  | 51                                     | 0.7 ± 0.1                           | —                            | 51                                            | 0                                              | 0                                               | —                                                         | —                                                         | —                                  |
| Circular DNA N1 | 61                                     | 0.8 ± 0.1                           | 1.3 ± 0.2                    | 16                                            | 45                                             | 0                                               | —                                                         | 37                                                        | 82% (37/45)                        |
| Circular DNA P1 | 69                                     | 0.6 ± 0.1                           | 1.0 ± 0.3                    | 17                                            | 52                                             | 0                                               | 35                                                        | —                                                         | 67% (35/52)                        |
| Circular DNA 2  | 57                                     | 0.7 ± 0.1                           | —                            | 55                                            | 2                                              | 0                                               | —                                                         | —                                                         | —                                  |
| Circular DNA N2 | 68                                     | 0.7 ± 0.1                           | 1.2 ± 0.2                    | 1                                             | 5                                              | 42                                              | —                                                         | 30                                                        | 71% (30/42)                        |
| Circular DNA P2 | 65                                     | 0.7 ± 0.2                           | 1.1 ± 0.2                    | 2                                             | 8                                              | 40                                              | 29                                                        | —                                                         | 73% (29/40)                        |

**References for Supplementary Information:**

- 1 Y. L. Lyubchenko and L. S. Shlyakhtenko, *Methods*, 2009, **47**, 206-213.
- 2 Y. L. Lyubchenko, A. A. Gall, L. S. Shlyakhtenko, R. E. Harrington, B. L. Jacobs, P. I. Oden and S. M. Lindsay, *J. Biomolec. Struct. Dyn.*, 1992, **9**, 589-606.
